# Supplementary material
Source: PubMed Central journal article supplement (PMC6173309)

**Supplementary Data 1 | TFs' binding specificities in NCAP-SELEX and HT-SELEX libraries.** The phylogenetic tree was generated based on the amino acid sequences of the TF DBDs. The primary motifs were curated for lig147 NCAP-SELEX and HT-SELEX libraries with manually curated seeds (see **Method** for details). As a nucleosome wraps 147 bp DNA, we expect no flanking free DNA presents in the lig147 NCAP-SELEX. Motif matching results for each TF's cycle 4 and cycle 0 libraries were illustrated. The published motifs were from our previous curations<sup>1,2</sup>.

In the absence of nucleosome, some TFs still show a biased distribution of motif match towards one end or both ends of the ligand. This bias potentially originates from the fixed adaptors of the SELEX ligand. The 10 bp periodic preference for some TFs in HT-SELEX (e.g. ETS factors) likely emerge from quenching of the vibrational modes of DNA<sup>3</sup>. The asymmetry of the ligand due to the fixed linker sequences most likely results in this pattern occurring at specific positions of the ligand. Such pattern of ETS is less obvious in NCAP-SELEX because nucleosome decreased the overall binding.

1. Yin, Y. *et al.* Impact of cytosine methylation on DNA binding specificities of human transcription factors. *Science* **356**, eaaj2239 (2017).
2. Jolma, A. *et al.* DNA-binding specificities of human transcription factors. *Cell* **152**, 327-339 (2013).
3. Kim, S. *et al.* Probing Allostery Through DNA. *Science* **339**, 816-819 (2013).

# bHLH

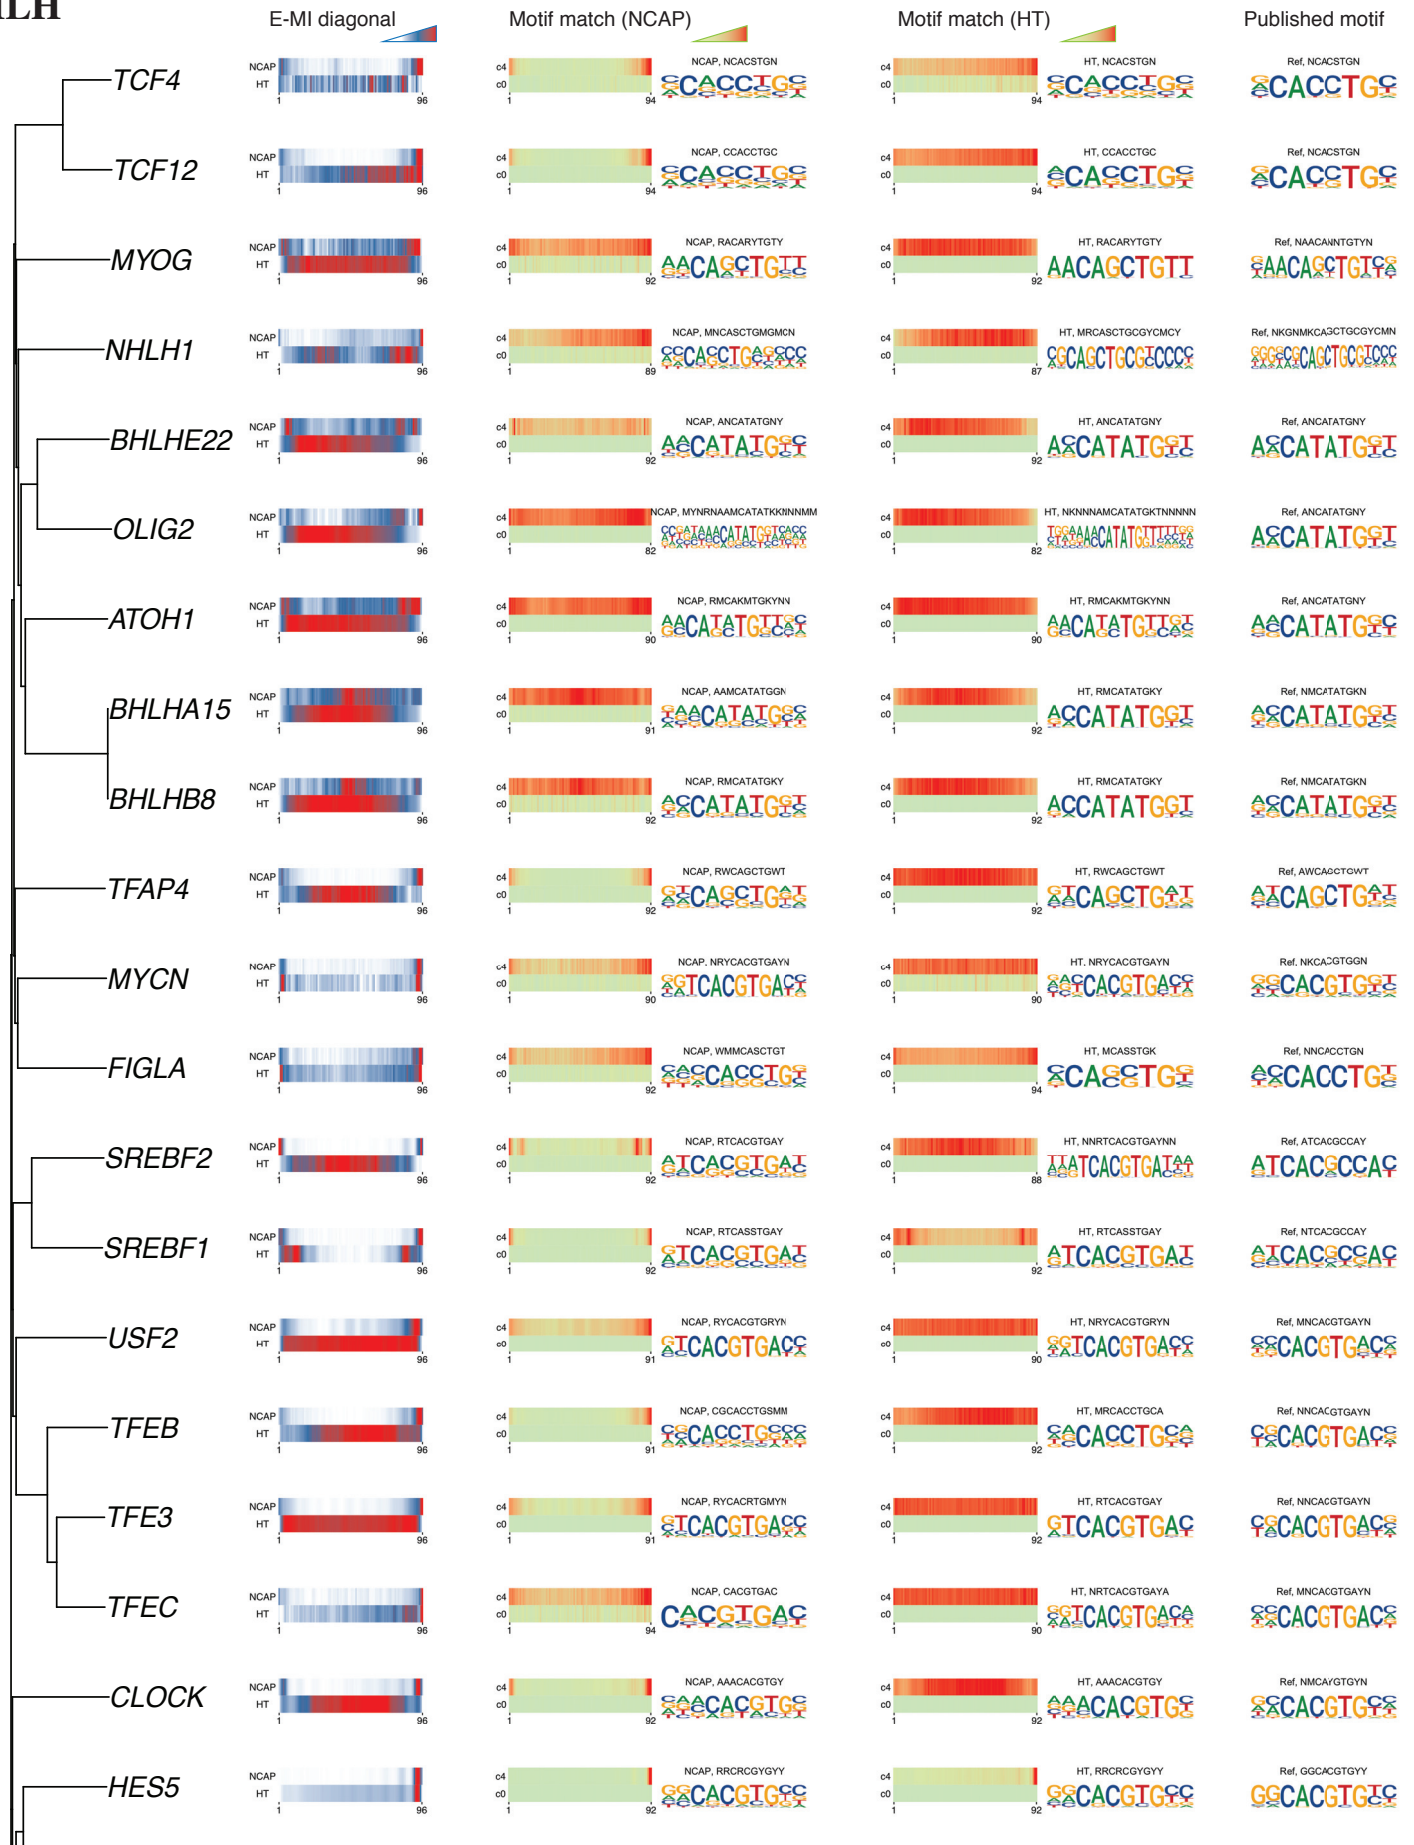

# bHLH

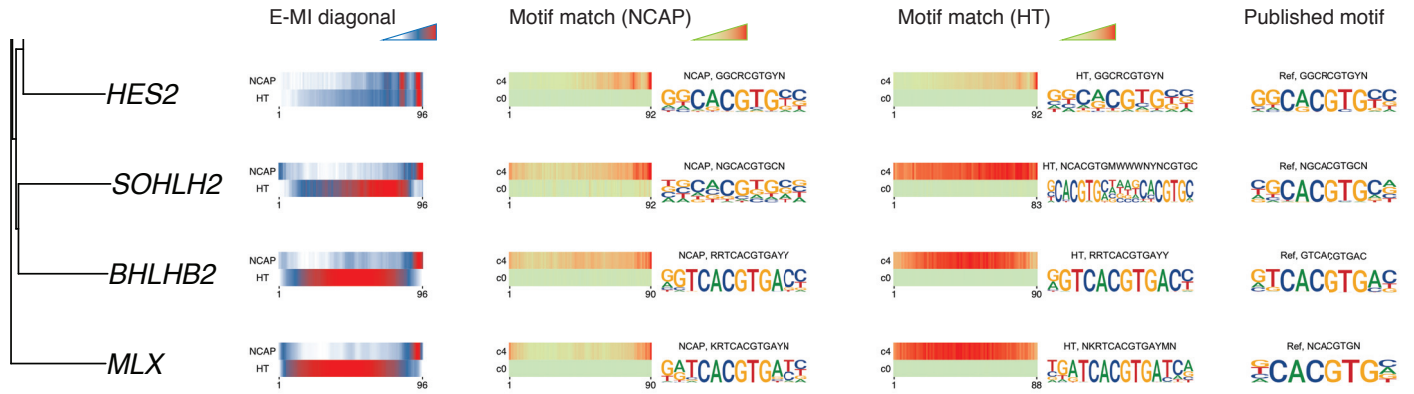

# bZIP

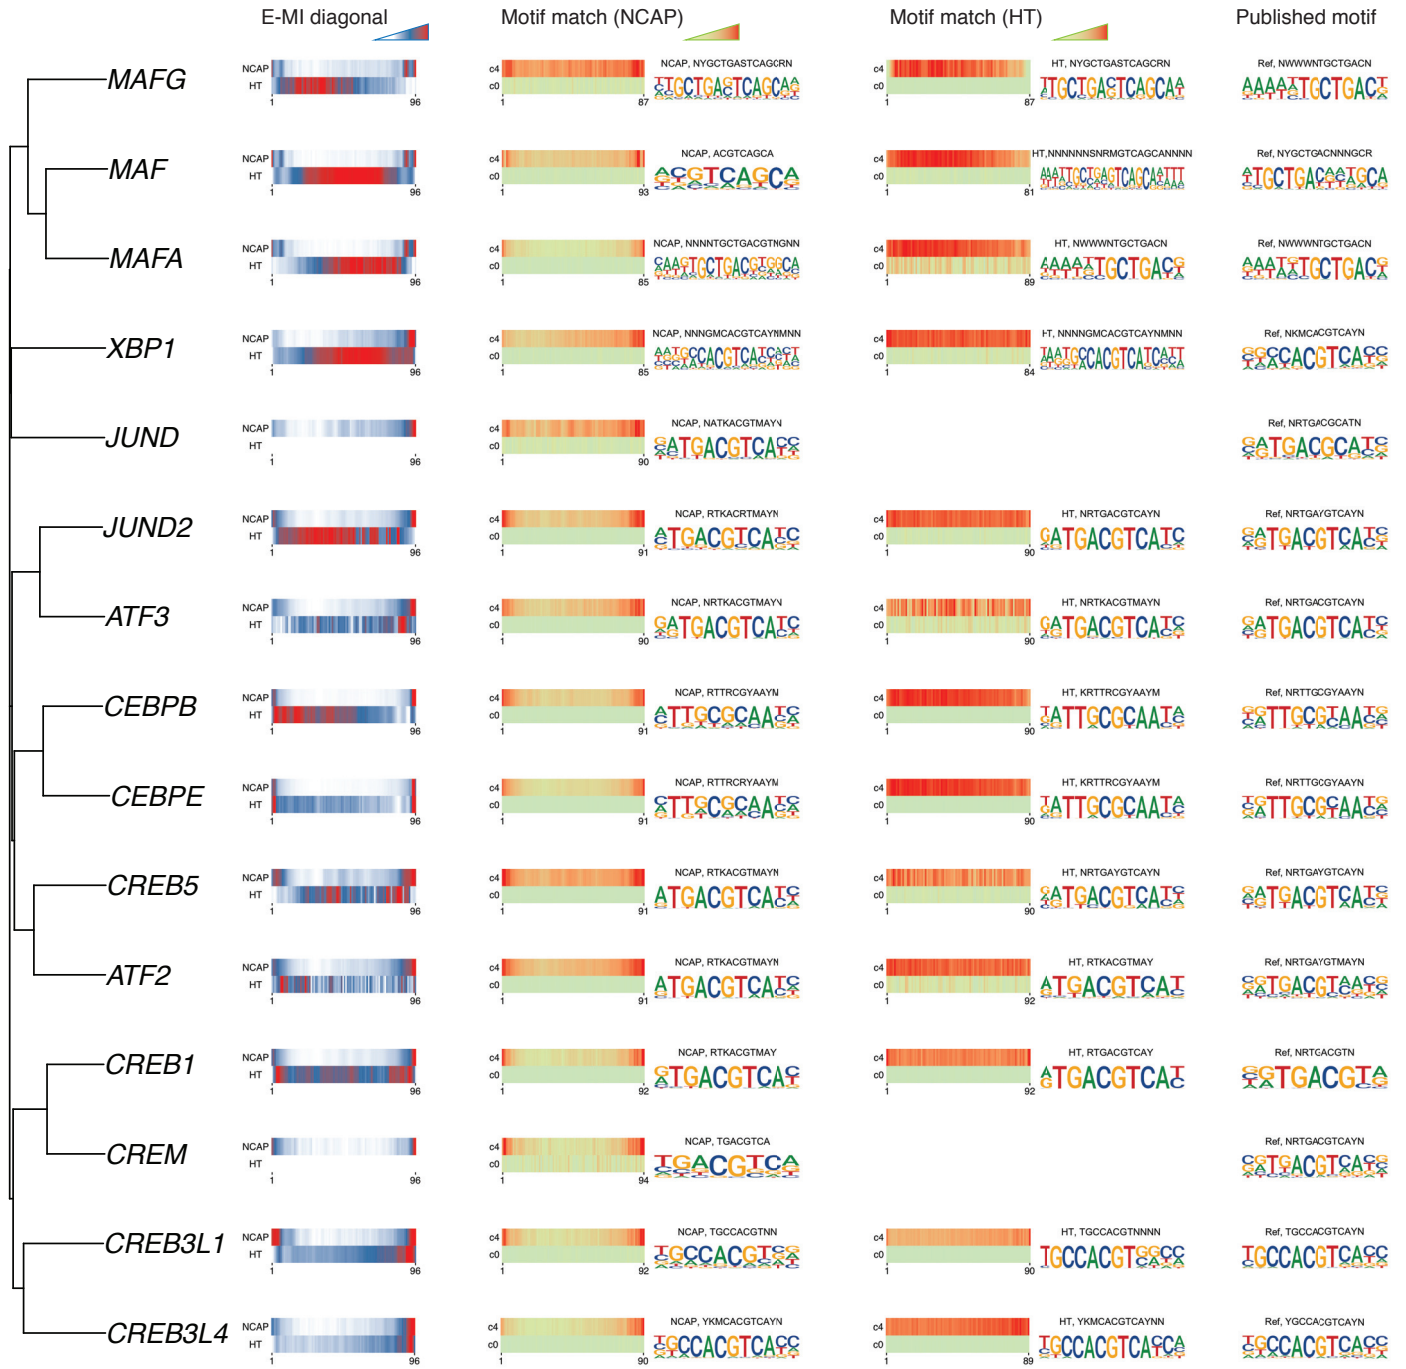

# ETS

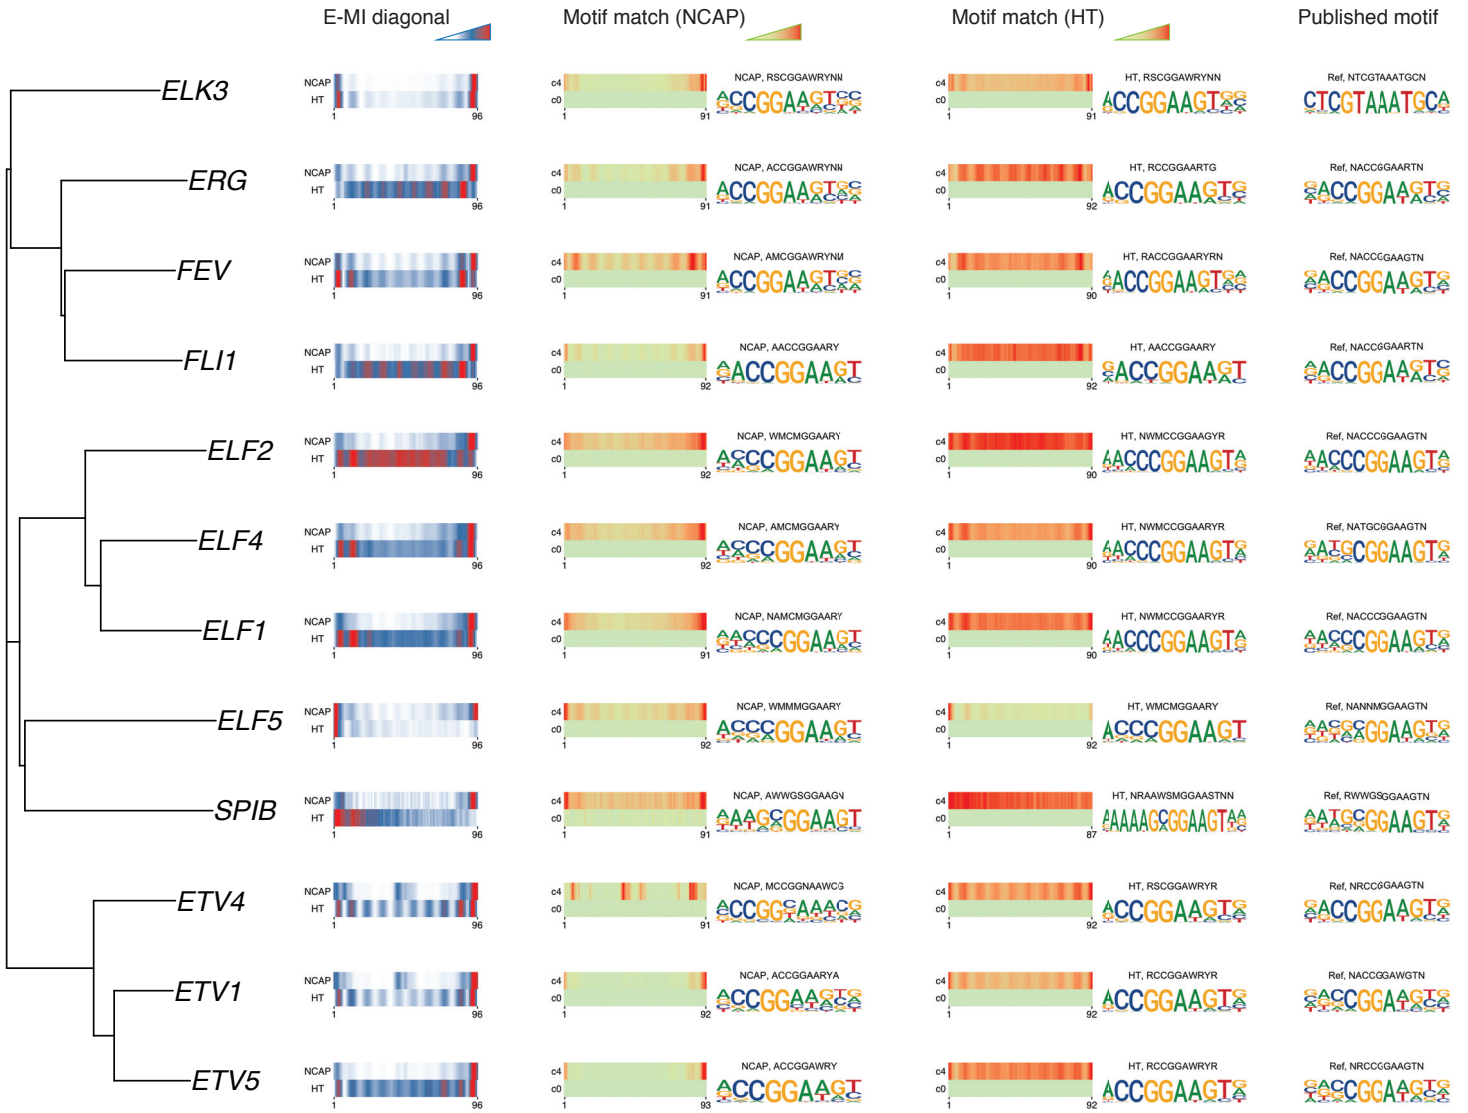

# Forkhead

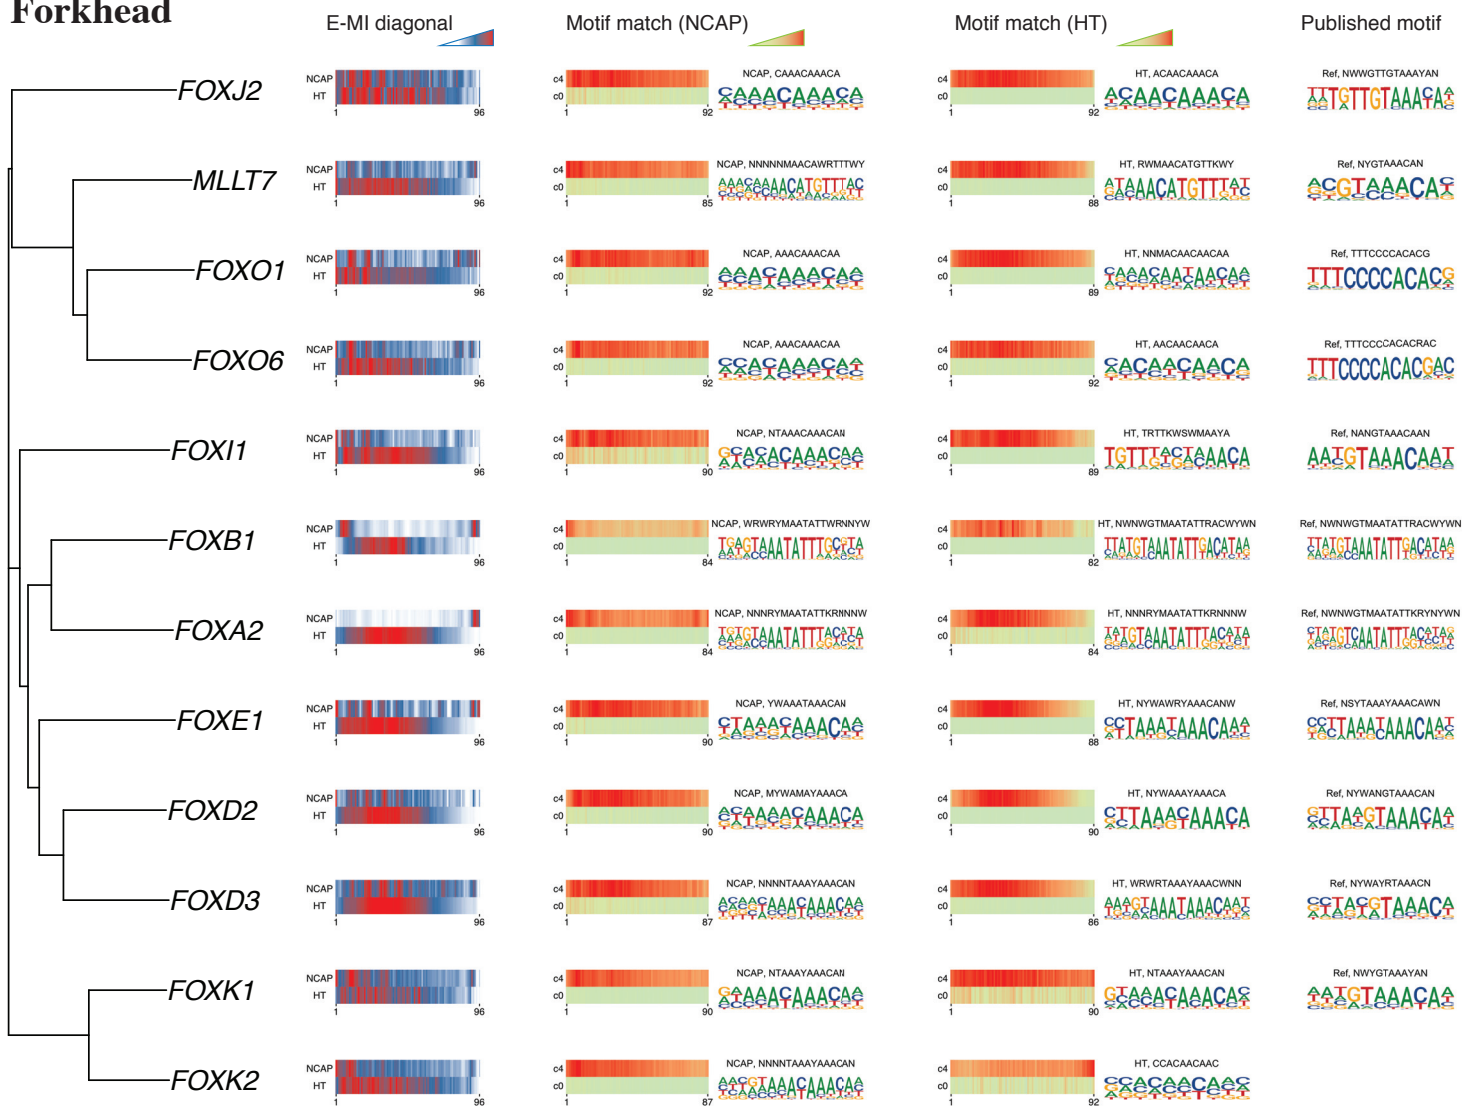

# HMG

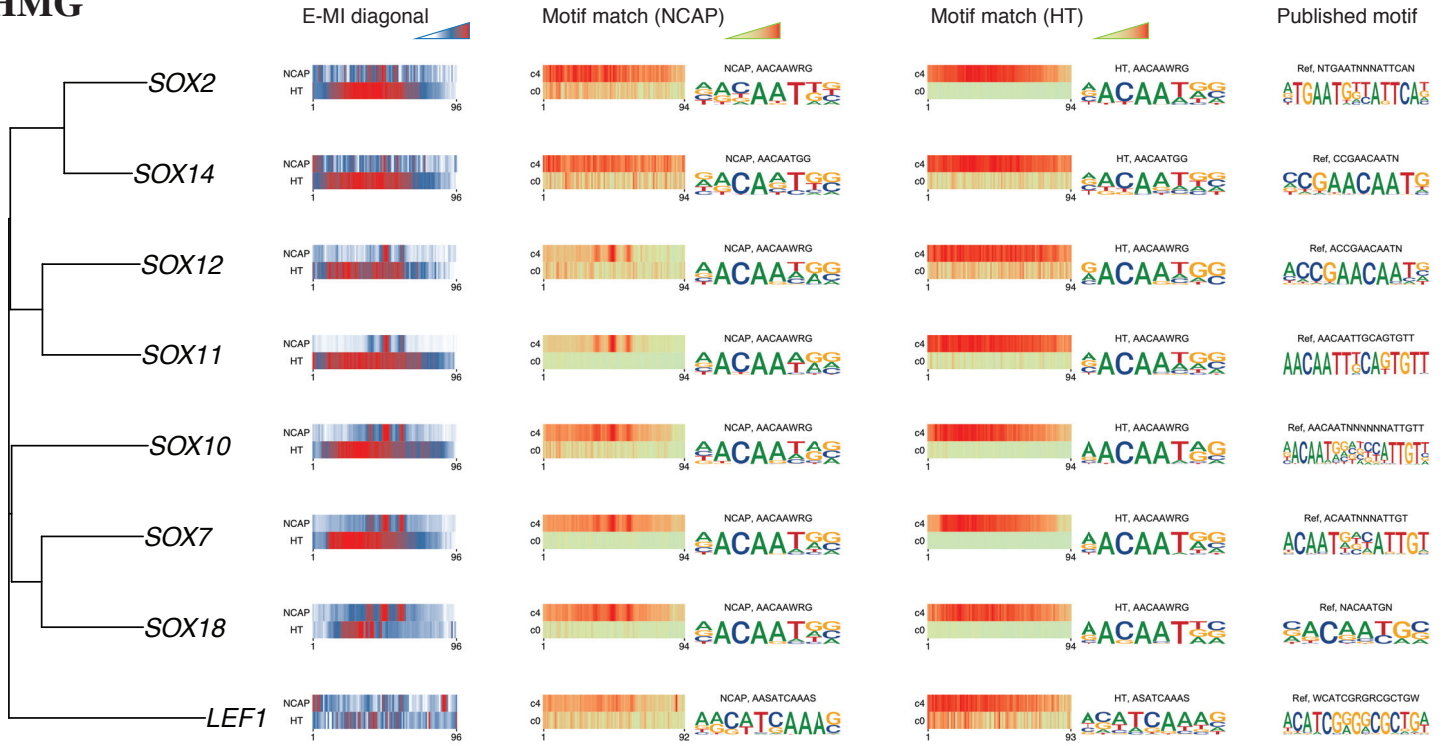

# Homeodomain

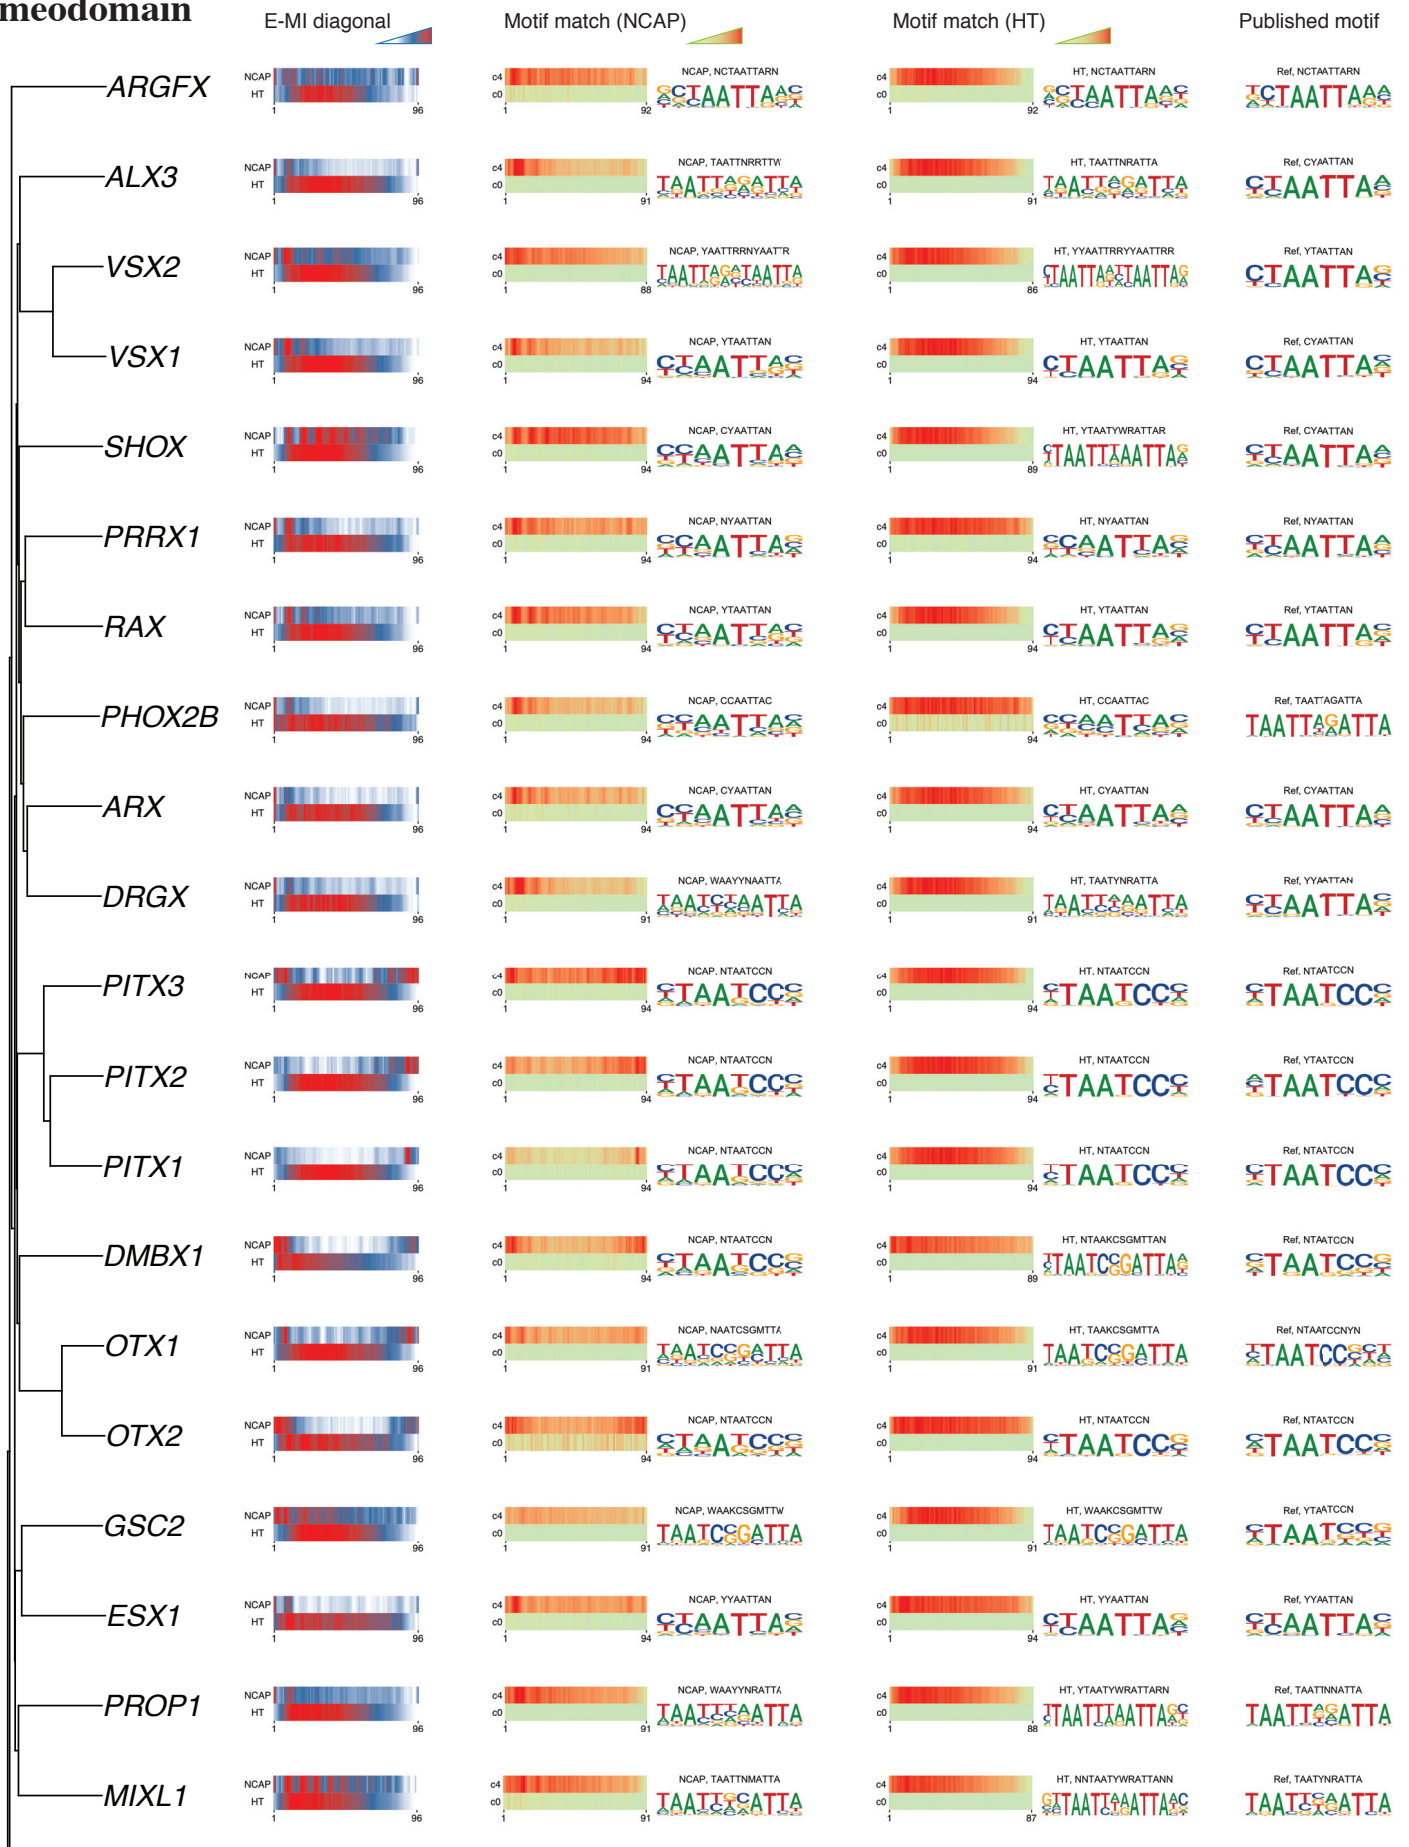



# Homeodomain

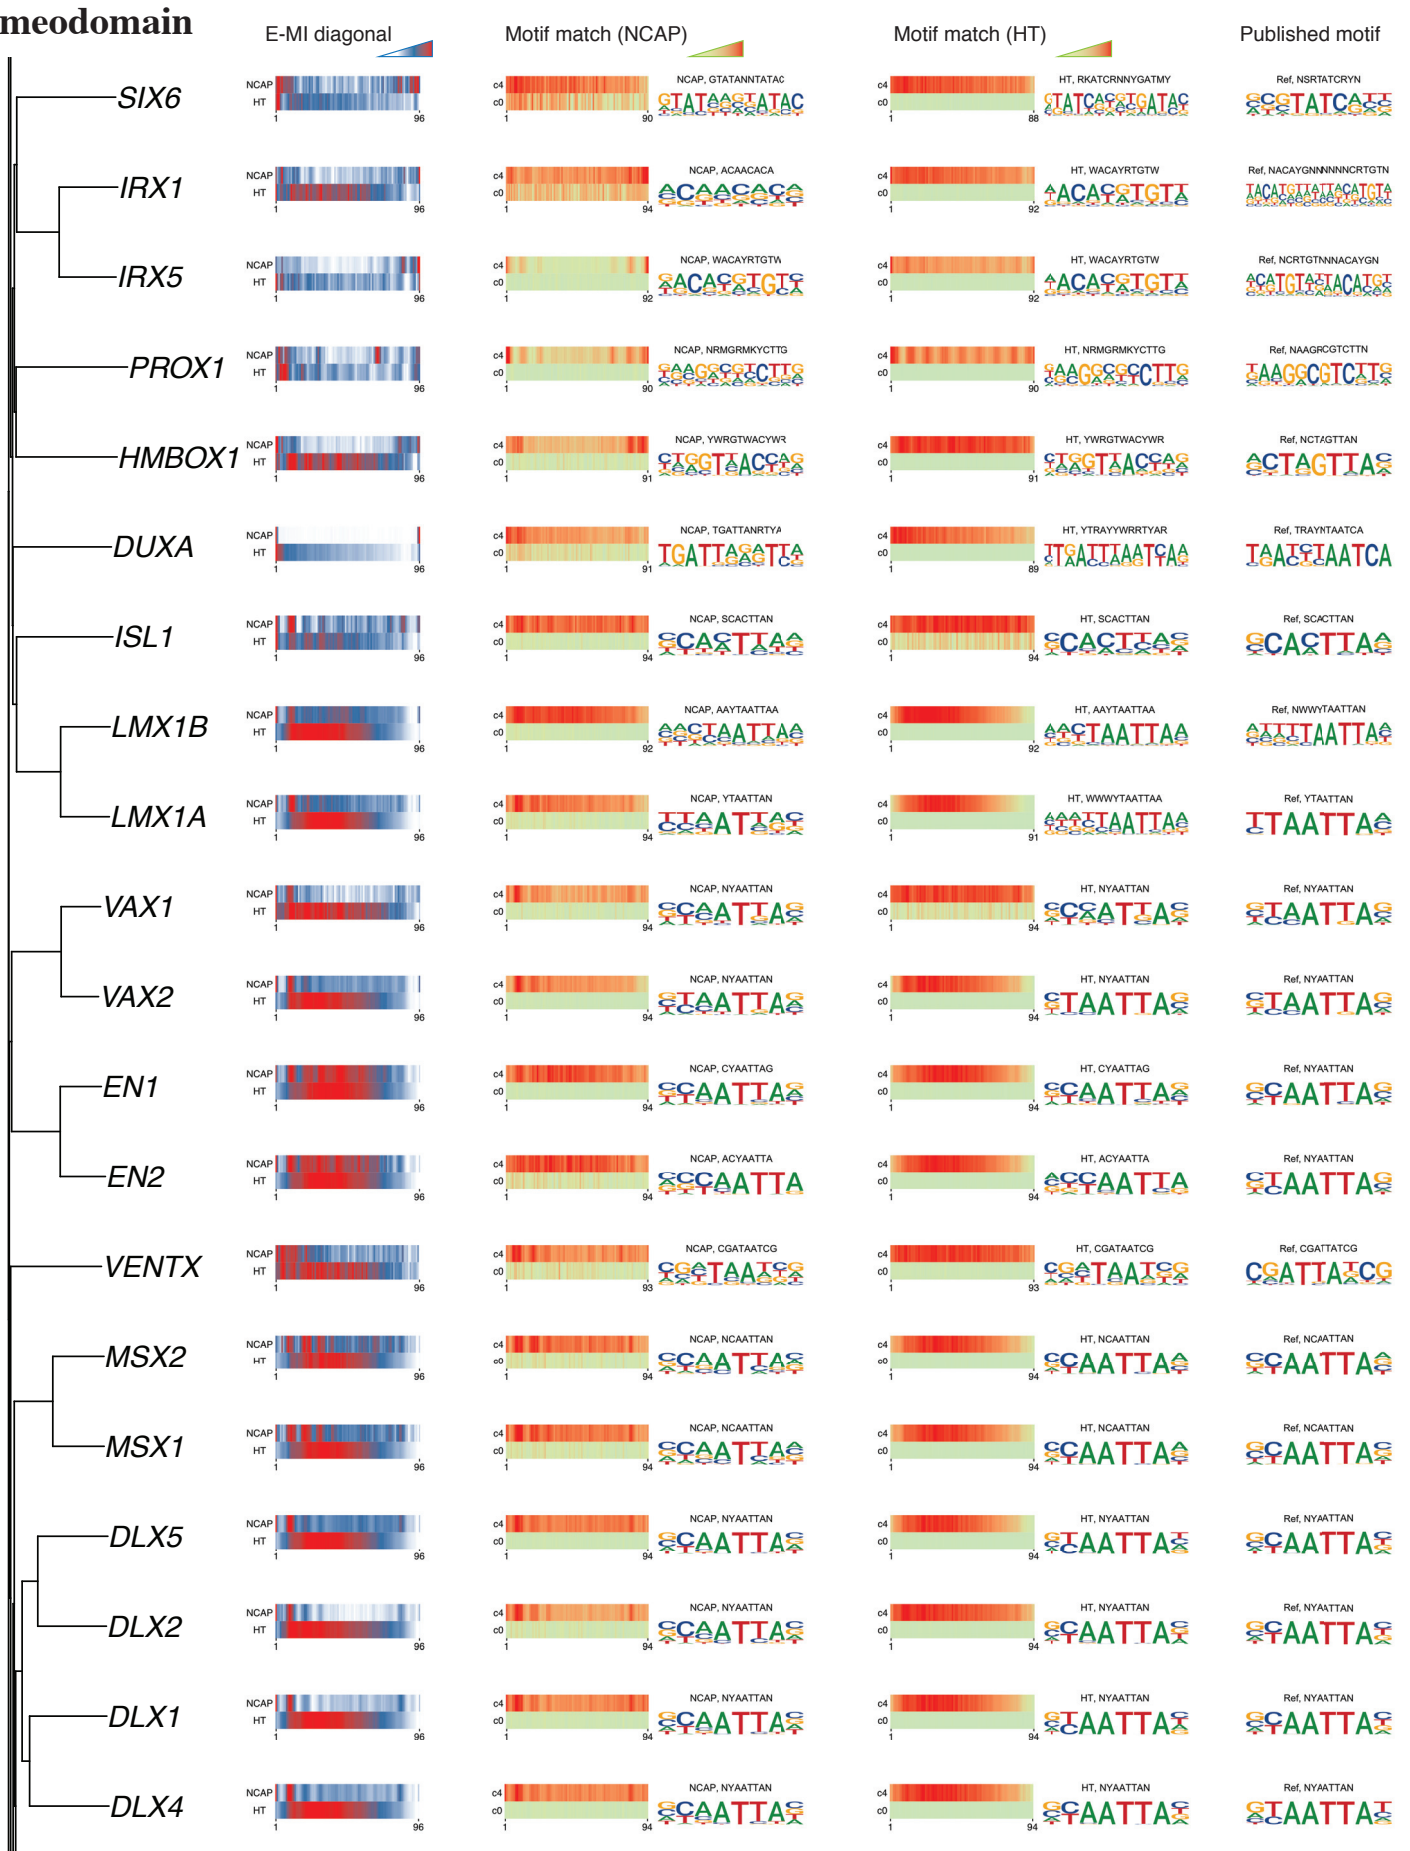

# Homeodomain

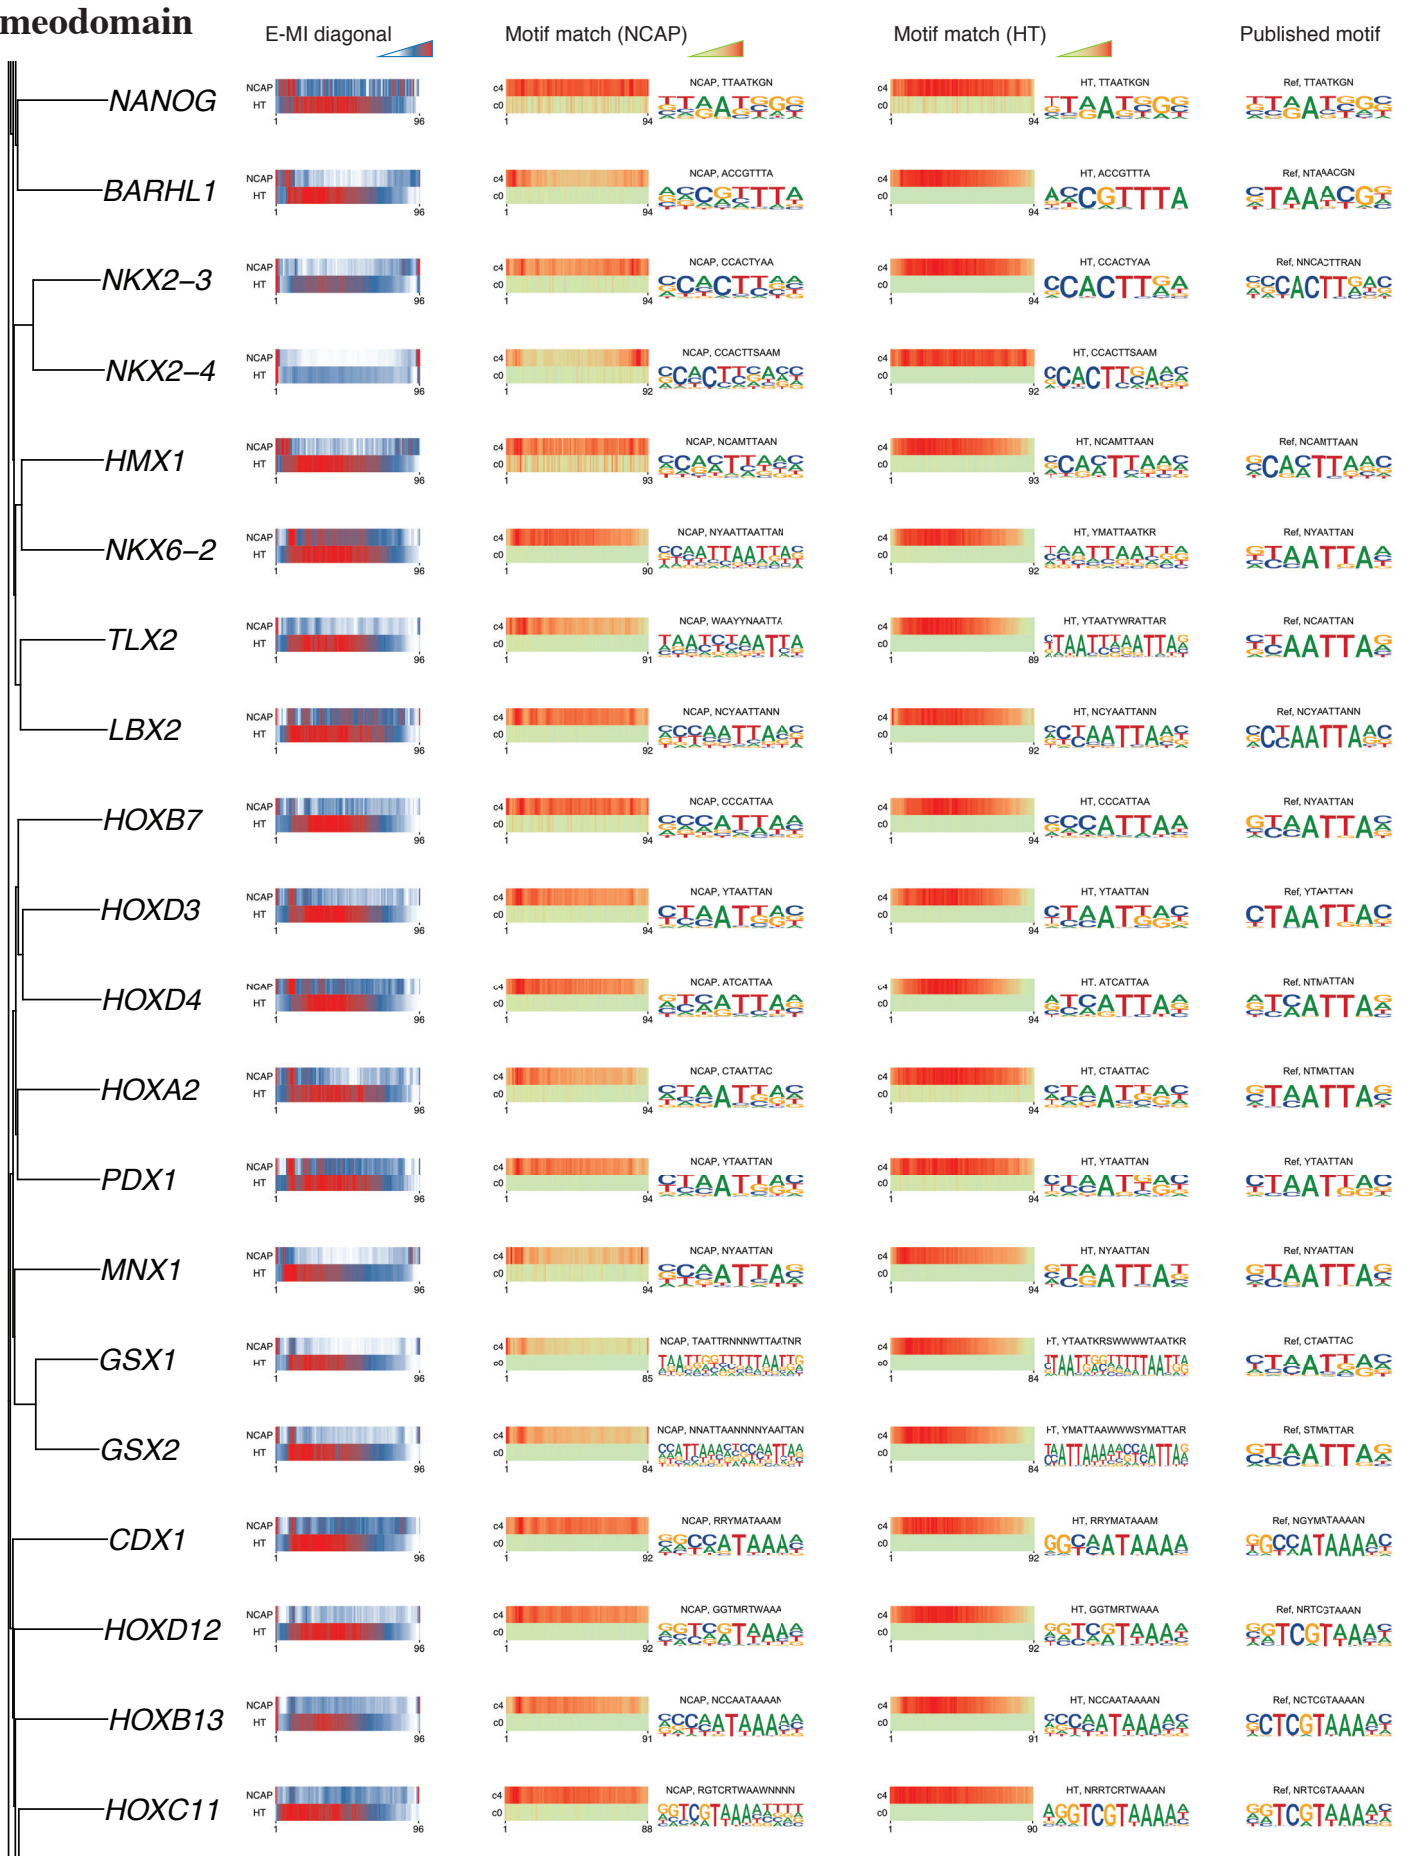

## Homeodomain

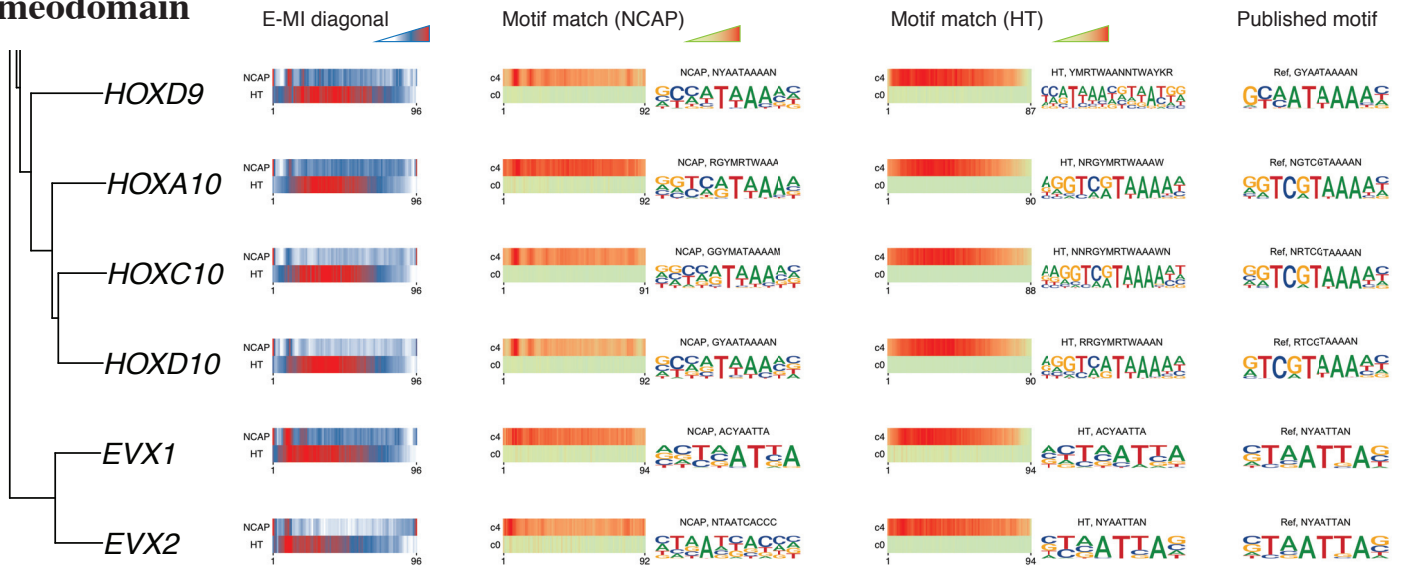

## MEIS

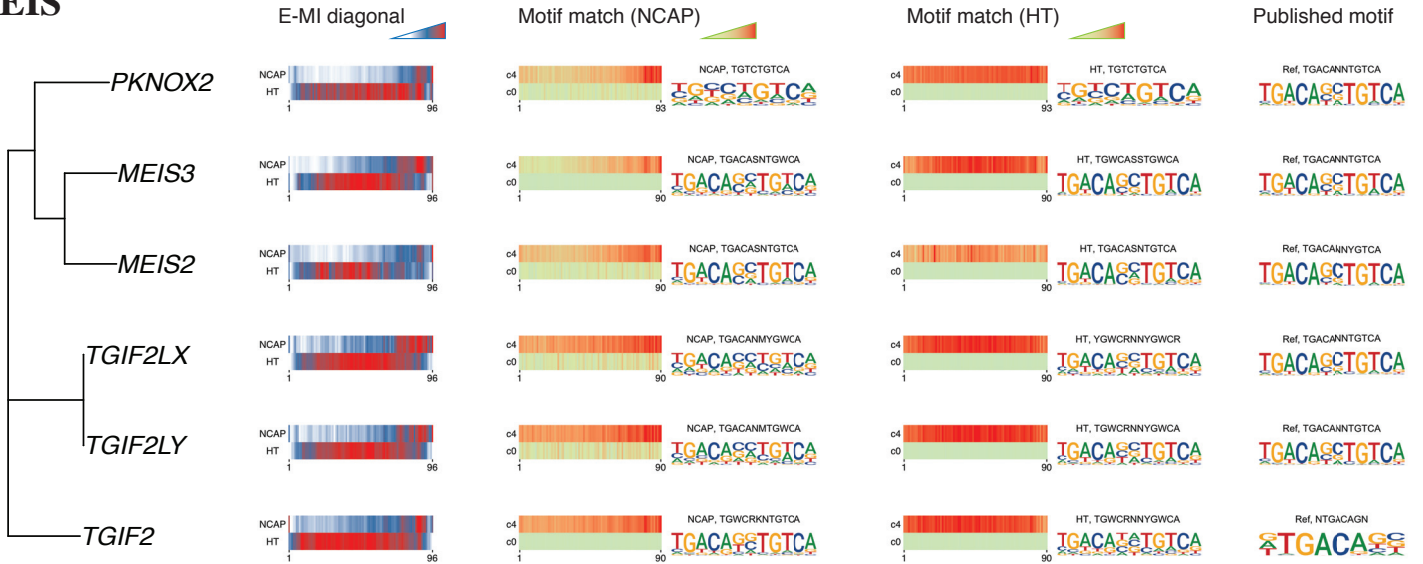

## Nuclear receptor

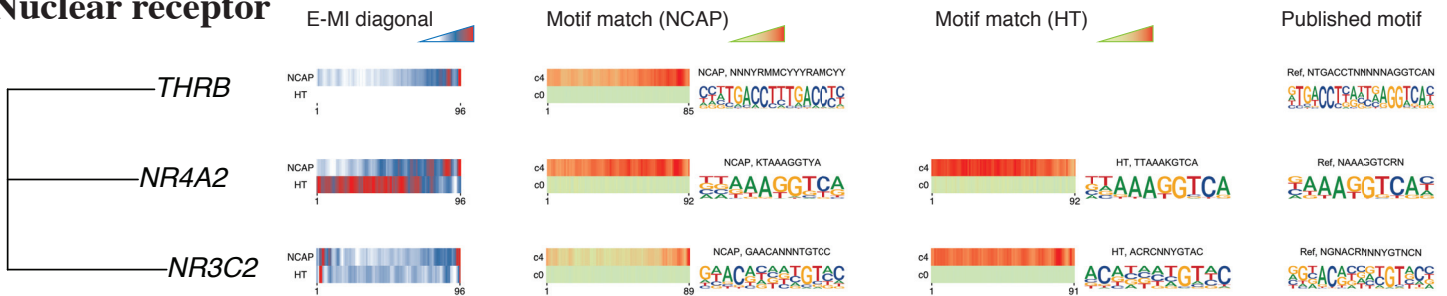

# PAX

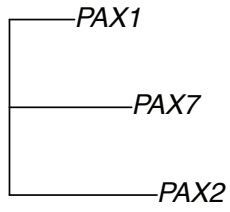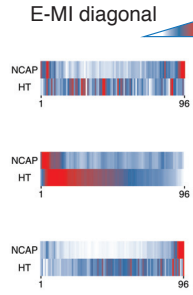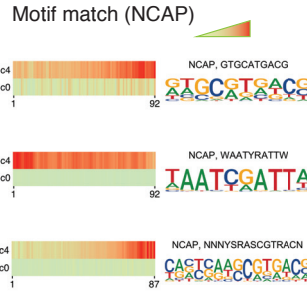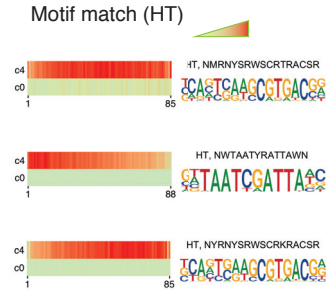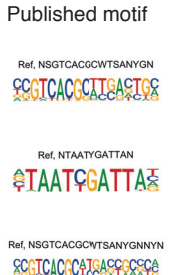

# POU

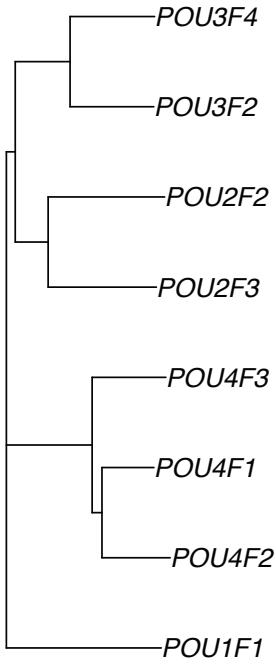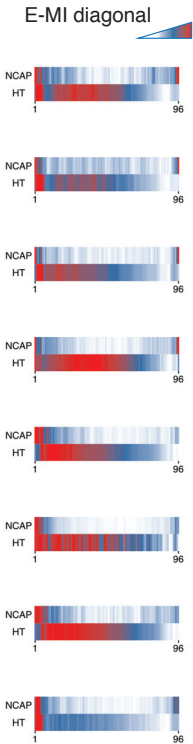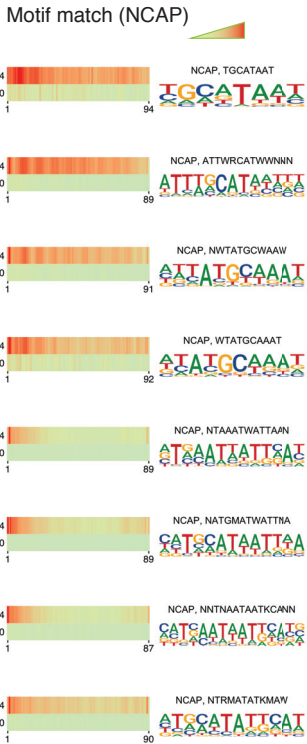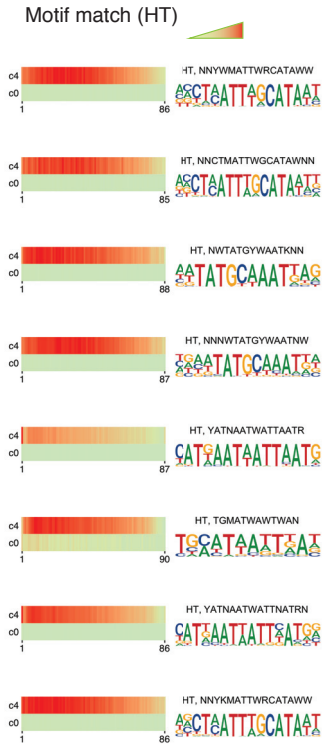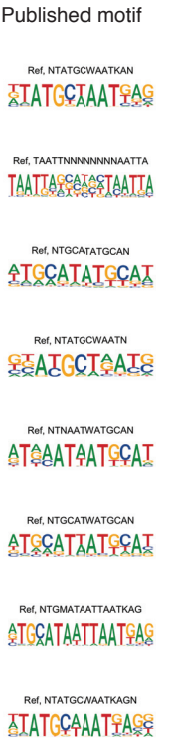

# RFX

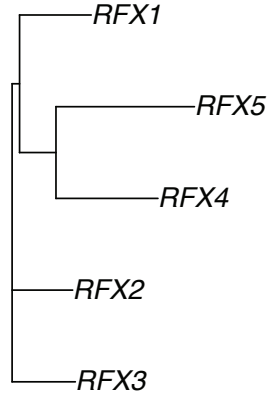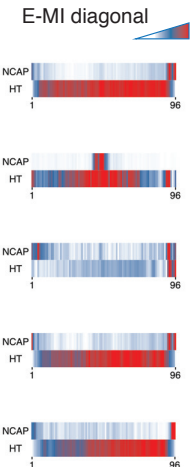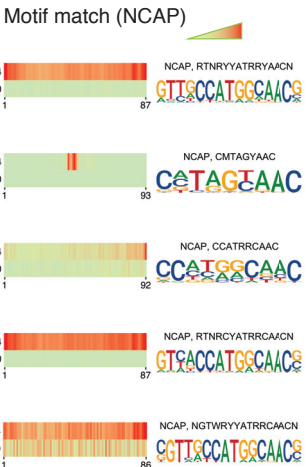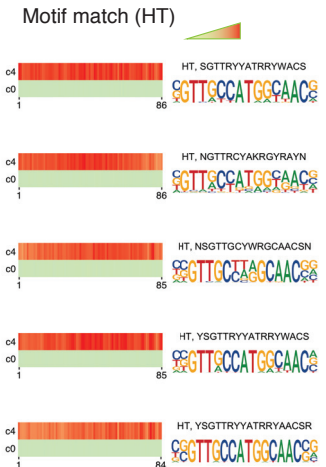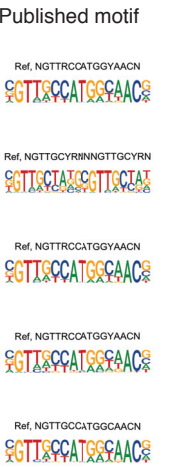

## RHD

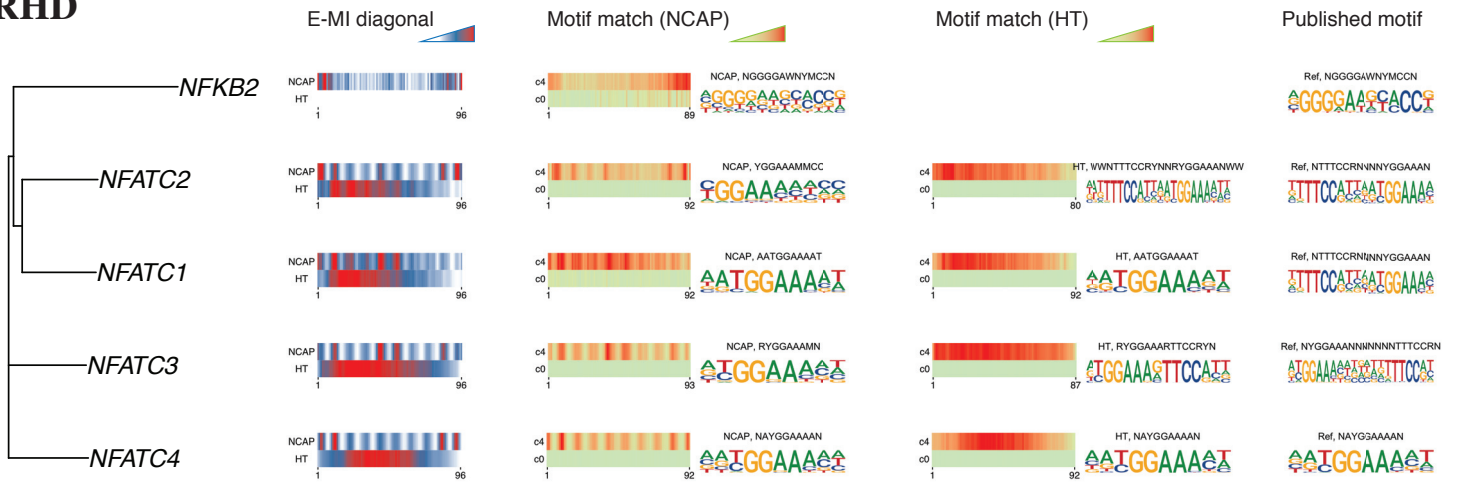

## T box

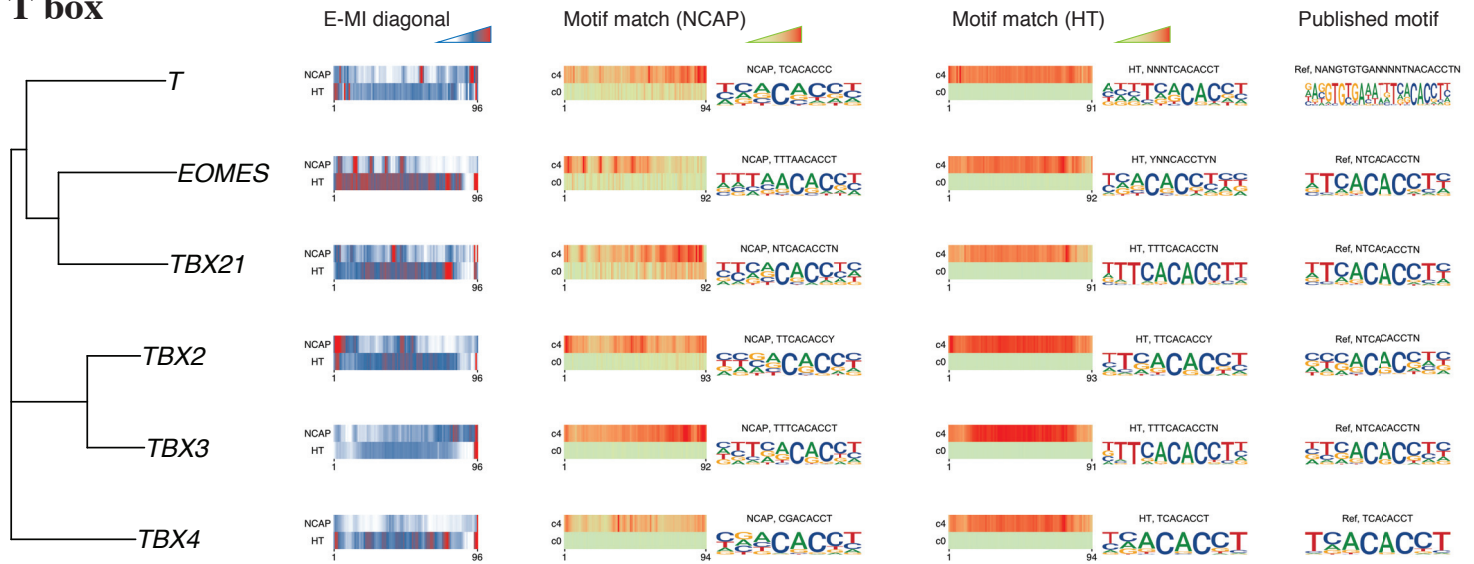

## Znf C2H2

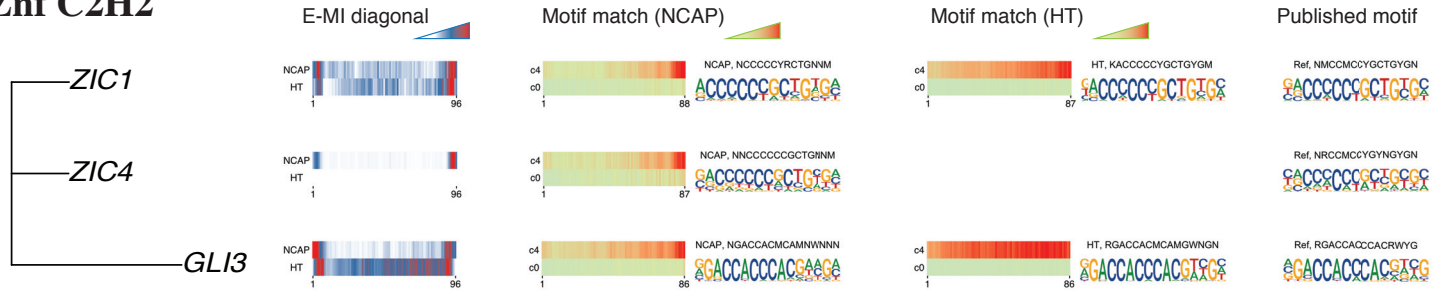

## Znf GATA

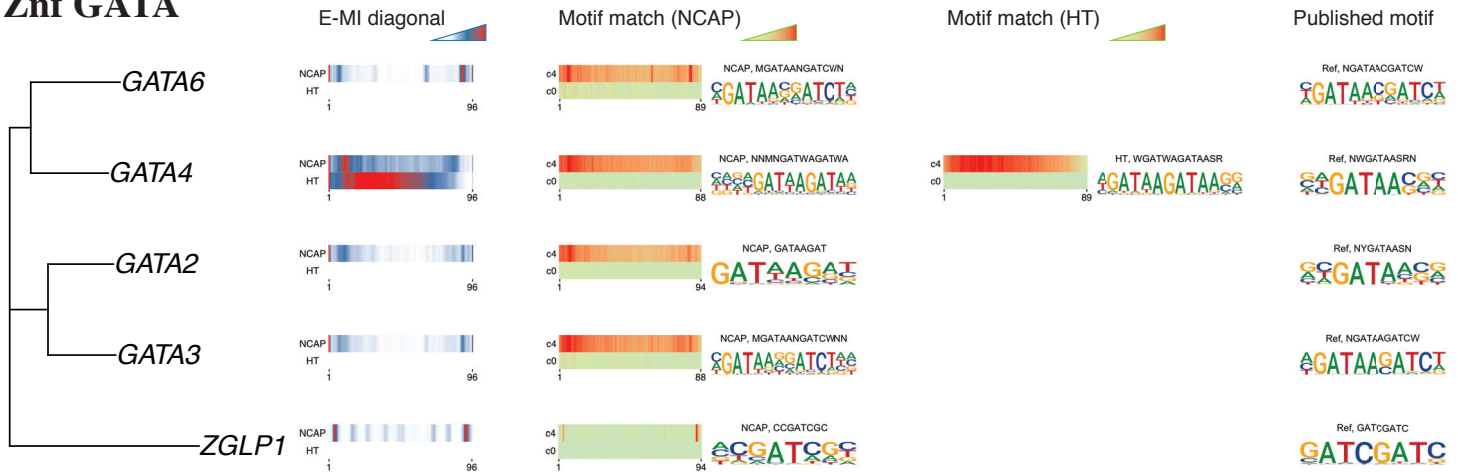

## Other families

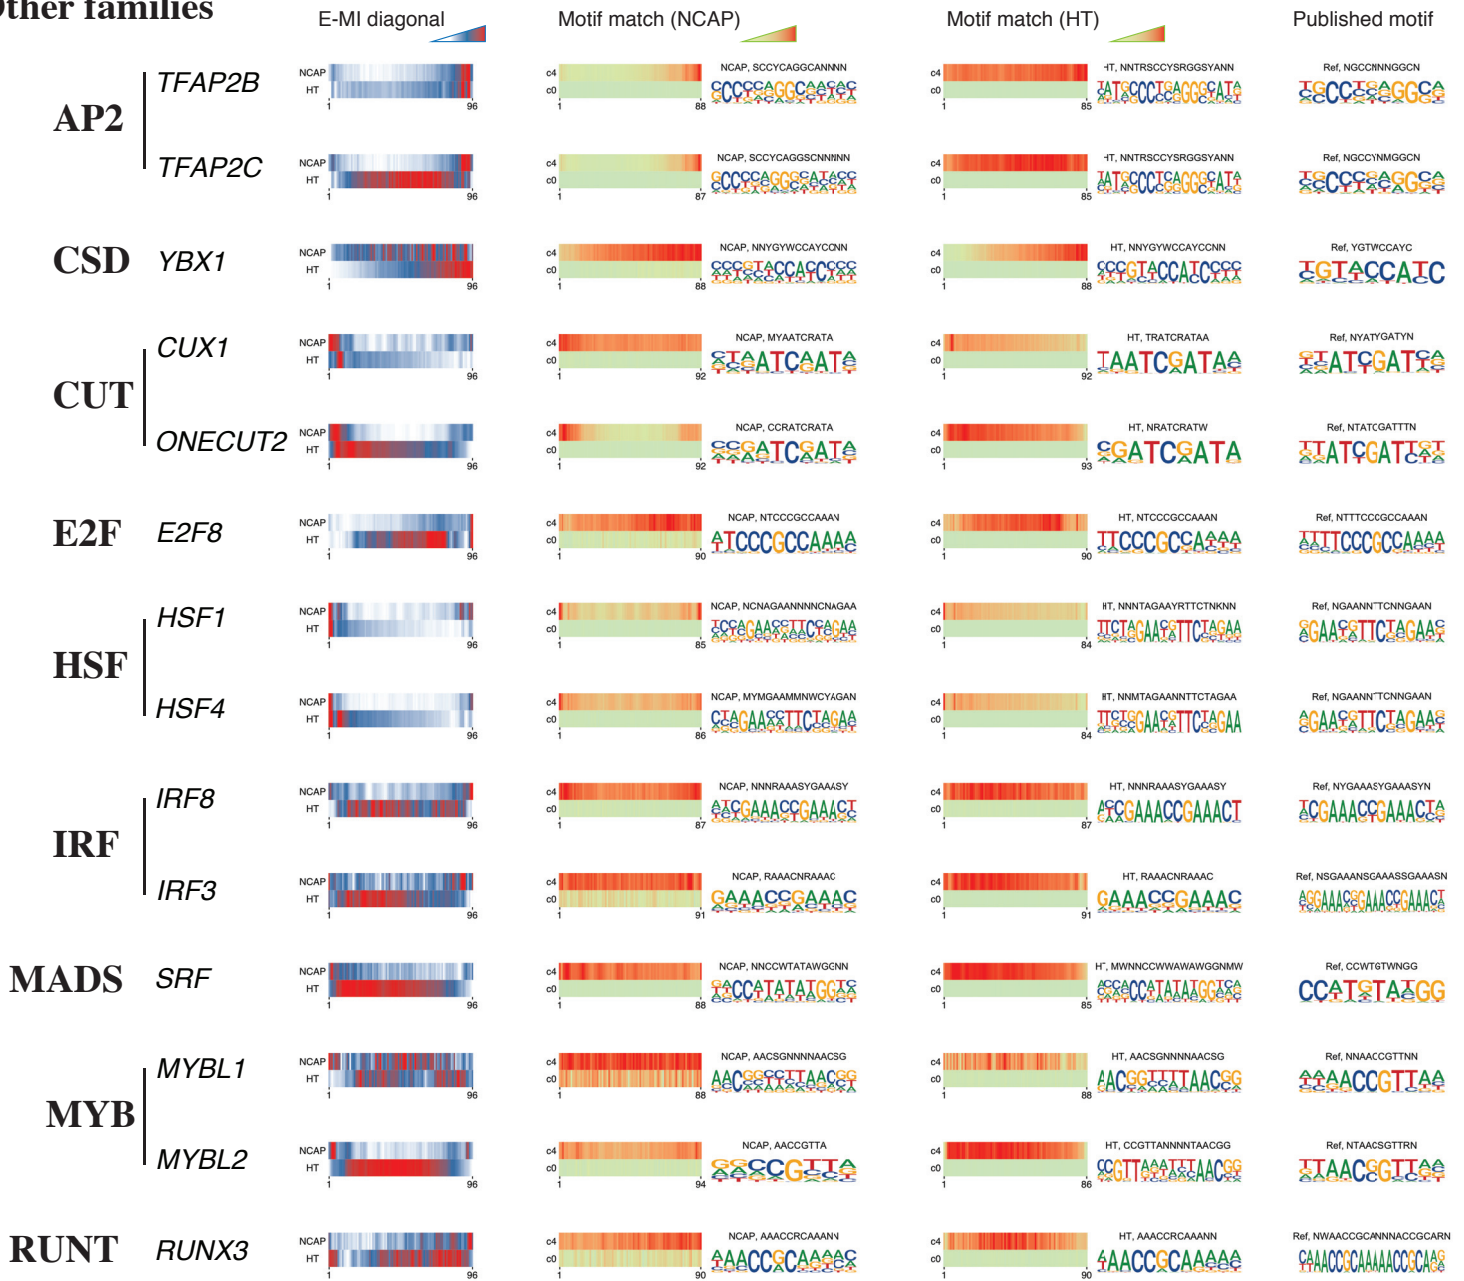

Supplement: NIHMS78948-supplement-Supplementary_Data_1.pdf [file NIHMS78948-supplement-Supplementary_Data_1.pdf]
