# Supplementary material
Source: PubMed Central journal article supplement (PMC6173309)
Supplement: NIHMS78948-supplement-Reporting_Summary.pdf [file NIHMS78948-supplement-Reporting_Summary.pdf]

## Reporting Summary

Nature Research wishes to improve the reproducibility of the work that we publish. This form provides structure for consistency and transparency in reporting. For further information on Nature Research policies, see [Authors & Referees](#) and the [Editorial Policy Checklist](#).

### Statistical parameters

When statistical analyses are reported, confirm that the following items are present in the relevant location (e.g. figure legend, table legend, main text, or Methods section).

n/a Confirmed

- The exact sample size ( $n$ ) for each experimental group/condition, given as a discrete number and unit of measurement
- An indication of whether measurements were taken from distinct samples or whether the same sample was measured repeatedly
- The statistical test(s) used AND whether they are one- or two-sided  
*Only common tests should be described solely by name; describe more complex techniques in the Methods section.*
- A description of all covariates tested
- A description of any assumptions or corrections, such as tests of normality and adjustment for multiple comparisons
- A full description of the statistics including central tendency (e.g. means) or other basic estimates (e.g. regression coefficient) AND variation (e.g. standard deviation) or associated estimates of uncertainty (e.g. confidence intervals)
- For null hypothesis testing, the test statistic (e.g.  $F$ ,  $t$ ,  $r$ ) with confidence intervals, effect sizes, degrees of freedom and  $P$  value noted  
*Give  $P$  values as exact values whenever suitable.*
- For Bayesian analysis, information on the choice of priors and Markov chain Monte Carlo settings
- For hierarchical and complex designs, identification of the appropriate level for tests and full reporting of outcomes
- Estimates of effect sizes (e.g. Cohen's  $d$ , Pearson's  $r$ ), indicating how they were calculated
- Clearly defined error bars  
*State explicitly what error bars represent (e.g. SD, SE, CI)*

Our web collection on [statistics for biologists](#) may be useful.

### Software and code

Policy information about [availability of computer code](#)

Data collection

No software was used for Data collection

Data analysis

The softwares used in this manuscript include MOODS (v1.9.1), MACS (v2.1.1), Trim Galore (v0.4.3), samtools (v1.3.1), bwa (v0.7.16a), BEDtools (v2.26.0), Autoseed (Jolma, A. et al., Nature 527, 384-388 (2015); Nitta, K. R. et al, Elife 4, e04837 (2015)), PEAR (v0.9.8), UCSF Chimera (1.11.2), R (v3.4.0)

The R packages used include circlize (v0.4.3), ggplot2 (v2.2.1), FactoMineR (v1.39), NMF (v0.20.6)

Custom codes are available on request, this is stated in "Code availability" of the Methods section

For manuscripts utilizing custom algorithms or software that are central to the research but not yet described in published literature, software must be made available to editors/reviewers upon request. We strongly encourage code deposition in a community repository (e.g. GitHub). See the Nature Research [guidelines for submitting code & software](#) for further information.

### Data

Policy information about [availability of data](#)

All manuscripts must include a [data availability statement](#). This statement should provide the following information, where applicable:

- Accession codes, unique identifiers, or web links for publicly available datasets
- A list of figures that have associated raw data
- A description of any restrictions on data availability

All next generation sequencing data are deposited to European Nucleotide Archive (ENA) under Accession PRJEB22684 and mentioned in Data Availability Statement.

Most of our analyses are based on the E-MI diagonal values, the raw data is provided in Suppl. Table S3.

## Field-specific reporting

Please select the best fit for your research. If you are not sure, read the appropriate sections before making your selection.

Life sciences  Behavioural & social sciences

For a reference copy of the document with all sections, see [nature.com/authors/policies/ReportingSummary-flat.pdf](https://nature.com/authors/policies/ReportingSummary-flat.pdf)

## Life sciences

### Study design

All studies must disclose on these points even when the disclosure is negative.

|                 |                                                                                                                                                                                                                                                                                                                                                                                                                                                                             |
|-----------------|-----------------------------------------------------------------------------------------------------------------------------------------------------------------------------------------------------------------------------------------------------------------------------------------------------------------------------------------------------------------------------------------------------------------------------------------------------------------------------|
| Sample size     | The sequencing depth of NCAP-SELEX and HT-SELEX libraries was set to ensure that at least hundreds of thousands unique reads are available for each TF. Under this sample size, if a TF is binding nucleosomal DNA without restrictions, any non-random pattern of TF binding that has a biologically meaningful effect size (as observed in our study) can only occur with an extremely small p-value.                                                                     |
| Data exclusions | The failed SELEX experiments were excluded according to the QC criteria. The criteria define successful TFs as having detectably stronger E-MI between neighboring 3-mer pairs than that between 3-mer pairs far away from each other, and showing enriched motifs that are not contaminations from unrelated TFs (see "Quality control of the SELEX experiments" section in Methods). The exclusion criteria is established before we perform conclusion-related analyses. |
| Replication     | We performed multiple cycles (4–5) of SELEX for each TF. Each cycle is essentially a replicate of the same experiment. In addition, the whole SELEX procedure was also repeated for all TFs. For all the reported signals, their enrichment is observed across multiple SELEX cycles, and are reproducible between two or more independent batches of SELEX. Two replicates are available for the in vivo validation by MNase-ChIP.                                         |
| Randomization   | Samples were analyzed directly and individually, and not randomized to experimental groups                                                                                                                                                                                                                                                                                                                                                                                  |
| Blinding        | Most analyses were performed using computational algorithms. Investigators were not blinded.                                                                                                                                                                                                                                                                                                                                                                                |

## Materials & experimental systems

Policy information about [availability of materials](#)

| n/a                                 | Involvement in the study                                  |
|-------------------------------------|-----------------------------------------------------------|
| <input checked="" type="checkbox"/> | <input type="checkbox"/> Unique materials                 |
| <input type="checkbox"/>            | <input checked="" type="checkbox"/> Antibodies            |
| <input type="checkbox"/>            | <input checked="" type="checkbox"/> Eukaryotic cell lines |
| <input checked="" type="checkbox"/> | <input type="checkbox"/> Research animals                 |
| <input checked="" type="checkbox"/> | <input type="checkbox"/> Human research participants      |

### Antibodies

|                 |                                                                                                                                                                                                                                                                                   |
|-----------------|-----------------------------------------------------------------------------------------------------------------------------------------------------------------------------------------------------------------------------------------------------------------------------------|
| Antibodies used | The following antibody was used in this experiment: V5 Tag Monoclonal Antibody from Thermo Fisher Scientific, catalog # R960-25, RRID AB_2556564. The antibody was used at 1:200 dilution.                                                                                        |
| Validation      | Validated in previous publications for Human and Mouse, and by the following techniques: Immunocytochemistry (ICC), Immunoprecipitation (IP), Western Blot (WB), Immunohistochemistry (IHC), ELISA, Flow Cytometry, ChIP assay (ChIP), Immunohistochemistry (Paraffin) (IHC (P)). |

## Eukaryotic cell lines

Policy information about [cell lines](#)

|                                                                      |                                                                                                                                             |
|----------------------------------------------------------------------|---------------------------------------------------------------------------------------------------------------------------------------------|
| Cell line source(s)                                                  | LoVo (ATCC CCL-229), HEK293 (ATCC CRL-1573)                                                                                                 |
| Authentication                                                       | The LoVo and HEK293 cells were directly obtained from the trusted vendor (ATCC) and not from other laboratories and used within short time. |
| Mycoplasma contamination                                             | Tested to be free of mycoplasma infection by Hoechst staining                                                                               |
| Commonly misidentified lines<br>(See <a href="#">ICLAC</a> register) | No commonly misidentified cell lines were used.                                                                                             |

## Method-specific reporting

|                                     |                                                     |
|-------------------------------------|-----------------------------------------------------|
| n/a                                 | Involvement in the study                            |
| <input type="checkbox"/>            | <input checked="" type="checkbox"/> ChIP-seq        |
| <input checked="" type="checkbox"/> | <input type="checkbox"/> Flow cytometry             |
| <input checked="" type="checkbox"/> | <input type="checkbox"/> Magnetic resonance imaging |

## ChIP-seq

## Data deposition

- Confirm that both raw and final processed data have been deposited in a public database such as [GEO](#).
- Confirm that you have deposited or provided access to graph files (e.g. BED files) for the called peaks.

|                                                                    |                                                                                                             |
|--------------------------------------------------------------------|-------------------------------------------------------------------------------------------------------------|
| Data access links<br><i>May remain private before publication.</i> | <a href="https://www.ebi.ac.uk/ena/data/view/PRJEB22684">https://www.ebi.ac.uk/ena/data/view/PRJEB22684</a> |
| Files in database submission                                       | Available in the project description of the linked database                                                 |
| Genome browser session<br>(e.g. <a href="#">UCSC</a> )             | Available on request                                                                                        |

## Methodology

|                         |                                                                                                                                                                                            |
|-------------------------|--------------------------------------------------------------------------------------------------------------------------------------------------------------------------------------------|
| Replicates              | Two technical replicates are available for each MNase-ChIP experiment. Peaks in replicates enrich similar motifs.                                                                          |
| Sequencing depth        | Total reads: 51285876 (RFX5) and 53017344 (HOXB13). Uniquely mapped reads: 9184303 (RFX5) and 9715845 (HOXB13). The sequencing run is paired-end. The sequencing length is 91 bp.          |
| Antibodies              | V5 Tag antibody (R96025, ThermoFisher). All information available on vendor website                                                                                                        |
| Peak calling parameters | Peak called using MACS with<br>-f BAMPE -g hs -B -q 0.1 --nomodel -m 2 50<br>for MNase-ChIP__cell-HEK293__TF-RFX5__Replicate-1.bam and MNase-ChIP__cell-HEK293__TF-HOXB13__Replicate-1.bam |
| Data quality            | Correct TF motifs are discovered from the ChIP peaks. 6060 (HOXB13) and 1450 (RFX5) peaks are at FDR 5% and above 5-fold enrichment.                                                       |
| Software                | bwa {Li H. and Durbin R., Bioinformatics 25, 1754-1760 (2009)}<br>MACS {Zhang et al., Genome Biol. 9, pp. R137 (2008)}                                                                     |
