# Supplementary material
Source: PubMed Central journal article supplement (PMC6173309)

**Supplementary Data 3 | Control TFs without the gyre-spanning binding mode.**

For the randomly chosen control TFs shown in **Extended Data Fig. 2f**, the table lists the log<sub>2</sub> E-MI ratios between the bound and unbound libraries, both for the area corresponding to the gyre-spanning binding (Gs, 3-mers spaced by 77-83 bp) and for the area representing the background (bk, 3-mers spaced by 50-70 bp). For each TF, we tested against the null hypothesis that the (E-MI ratio (Gs) - E-MI ratio (bk)) of each TF is less or equal than that of all the 20 control TFs. The TFs with identified gyre-spanning mode (below the dashed line) have much smaller p-values than the control TFs.

The 2D E-MI heatmaps suggest that these TFs do not have the gyre-spanning mode as Brachyury (T) has; they are used for evaluation of the fluctuation of the background noise between the cycle 5 bound and unbound libraries.

| TF      | E-MI ratio (Gs) | E-MI ratio (bk) | p_value  |
|---------|-----------------|-----------------|----------|
| ELF2    | 0.8             | 0.8             | 0.028    |
| FOXD3   | 0.95            | 0.96            | 0.87     |
| PKNOX2  | 0.92            | 0.93            | 0.87     |
| LEF1    | 0.89            | 0.89            | 0.25     |
| BHLHA15 | 1               | 1               | 0.0043   |
| E2F8    | 0.91            | 0.92            | 0.98     |
| PITX2   | 0.99            | 0.98            | 0.15     |
| MYBL1   | 1.05            | 1.06            | 0.6      |
| IRF3    | 0.87            | 0.88            | 0.83     |
| HMBOX1  | 1.04            | 1.07            | 1        |
| HSF4    | 1.13            | 1.11            | 1.60E-07 |
| FOXE1   | 1.1             | 1.1             | 0.0038   |
| ATF2    | 0.94            | 0.95            | 1        |
| NR3C2   | 1               | 1.01            | 1        |
| CREB3L1 | 1.06            | 1.07            | 0.86     |
| LMX1B   | 1.04            | 1.06            | 1        |
| TBX3    | 1.01            | 1               | 2.00E-04 |
| CDX1    | 1.05            | 1.04            | 2.00E-05 |
| NFATC4  | 1.11            | 1.1             | 6.90E-07 |
| GATA2   | 1.04            | 1.04            | 0.99     |
| T       | 1.17            | 1.06            | 2.70E-20 |
| T       | 1.08            | 0.91            | 3.30E-23 |
| T       | 1.18            | 1               | 2.40E-24 |
| T       | 1.1             | 0.97            | 1.50E-21 |
| TBX2    | 1.77            | 1.08            | 6.00E-35 |
| TBX2    | 1.07            | 0.95            | 9.40E-21 |
| TBX2    | 1.53            | 1.09            | 2.70E-31 |

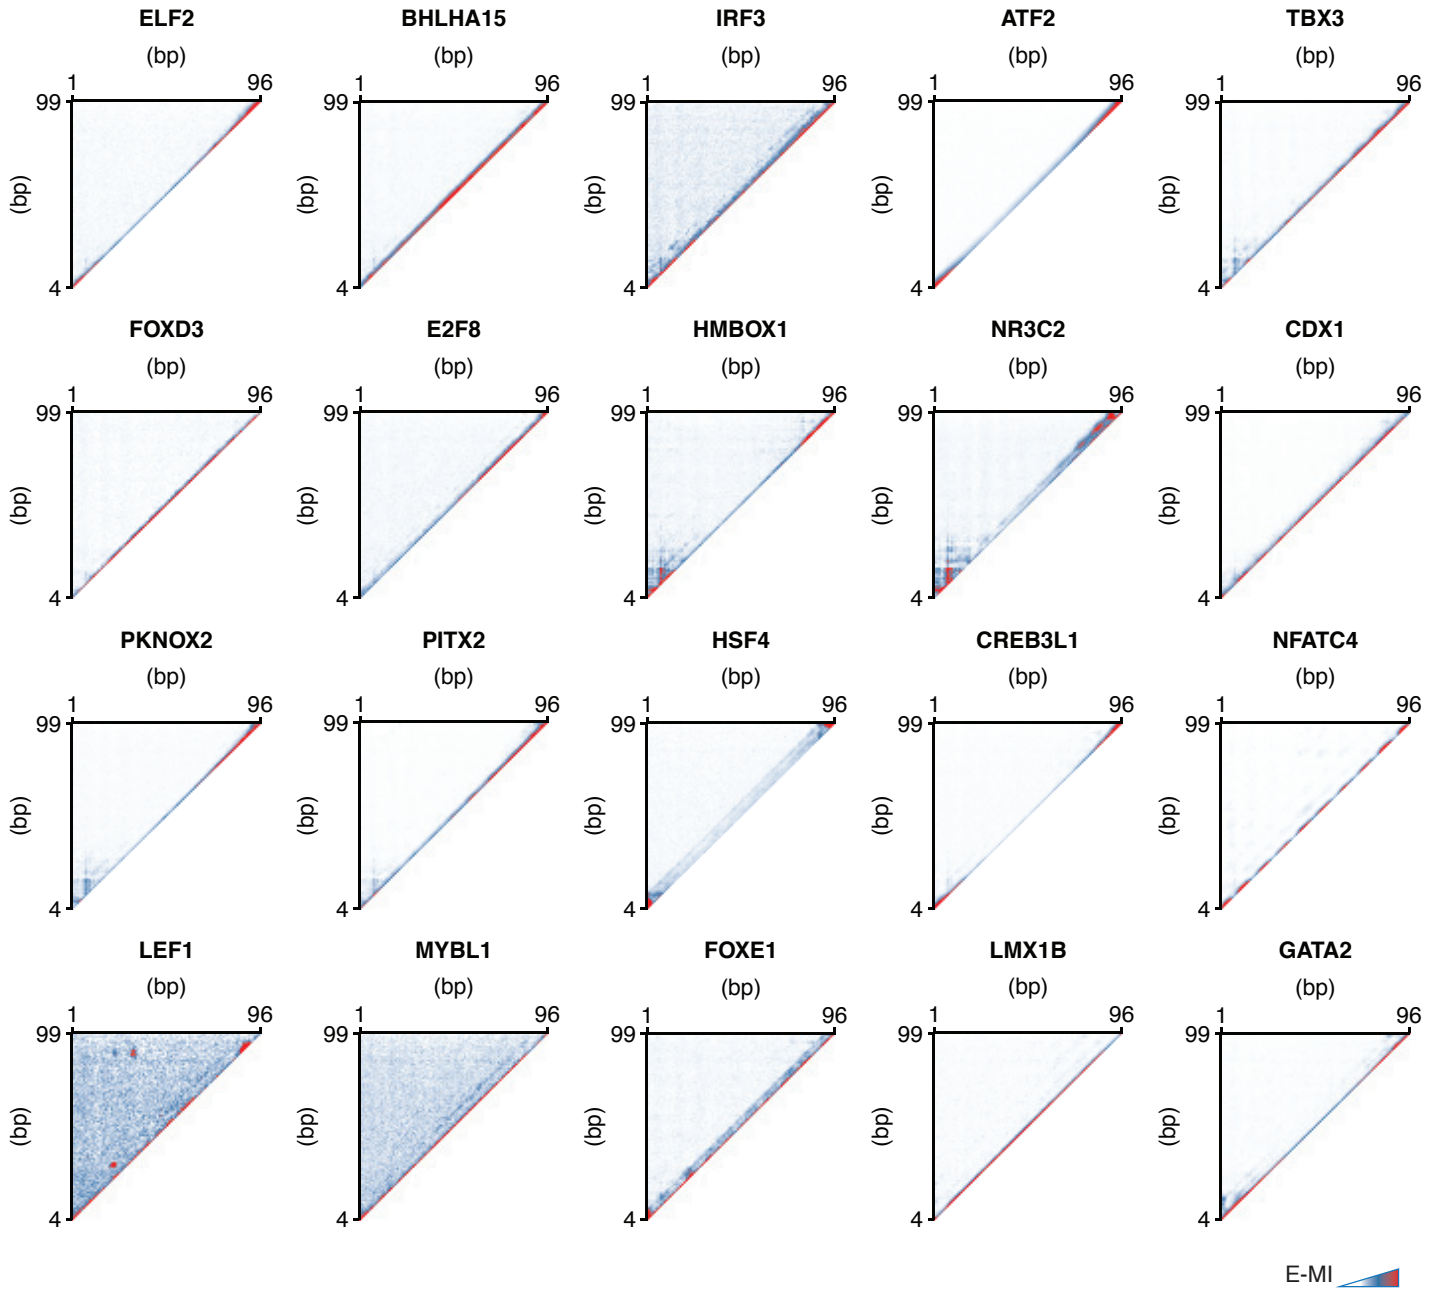

Supplement: NIHMS78948-supplement-Supplementary_Data_3.pdf [file NIHMS78948-supplement-Supplementary_Data_3.pdf]
