# Supplementary material
Source: PubMed Central journal article supplement (PMC6173309)

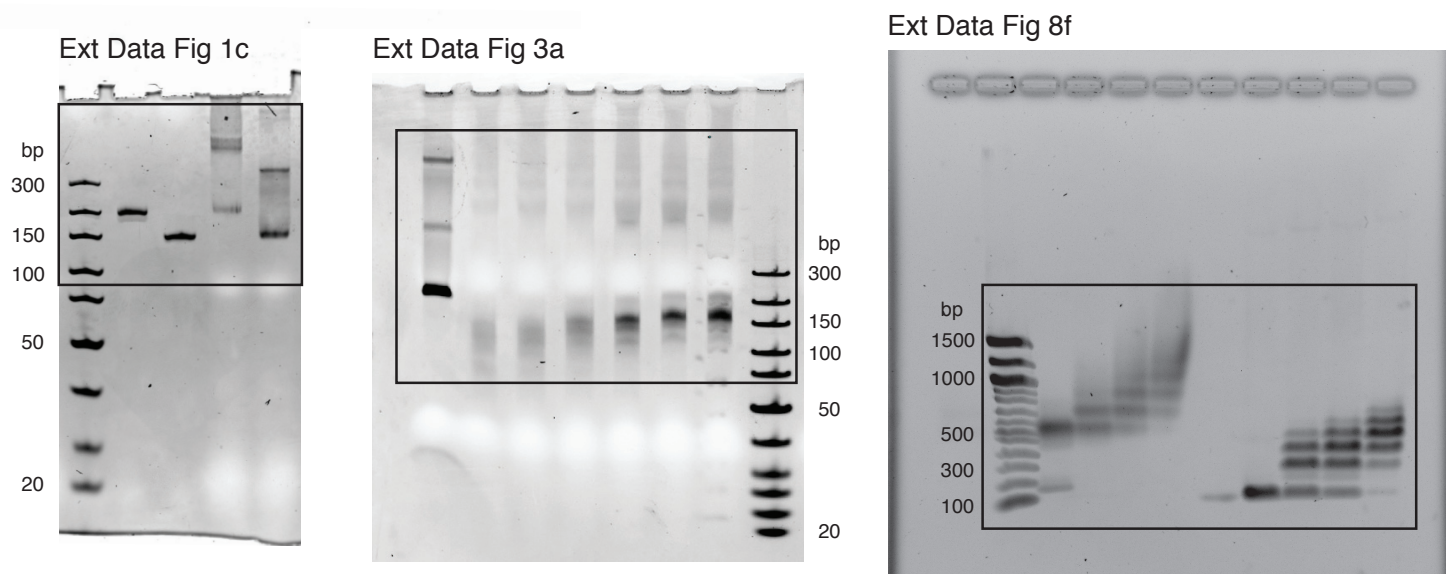

**Supplementary Figure 1 | Uncropped gel scans with size marker indications.**

Supplement: NIHMS78948-supplement-Supplementary_Fig_1.pdf [file NIHMS78948-supplement-Supplementary_Fig_1.pdf]
